# Supplementary material for: Synthesis of α-sulfonyloxyketones via iodobenzene diacetate (PIDA)-mediated oxysulfonyloxylation of alkynes with sulfonic acids
Source: Royal Society of Chemistry journal article supplement (doi:10.1039/c7ra11875a), 2017-01-01
Supplement: c7ra11875a1.pdf [file c7ra11875a1.pdf]

## Synthesis of $\alpha$ -sulfonyloxyketones via iodobenzene diacetate (PIDA)-mediated oxysulfonyloxylation of alkynes with sulfonic acids

Yang Zhang,\* Hua Tan, Weibing Liu\*

\*College of Chemical Engineering, Guangdong University of Petrochemical Technology, 2 Guandu Road, Maoming 525000, P. R. China; Email address: [450692624@qq.com](mailto:450692624@qq.com); [lwb409@gdupt.edu.cn](mailto:lwb409@gdupt.edu.cn)

### General Information.

All the reactions were carried out at room temperature for 24 h in a round-bottom flask equipped with a magnetic stir bar. Unless otherwise stated, all reagents and solvents were purchased from commercial suppliers and used without further purification.  $^1\text{H}$  NMR and  $^{13}\text{C}$  NMR spectra were recorded on a 400 MHz spectrometer in solutions of  $\text{CDCl}_3$  using tetramethylsilane as the internal standard;  $\delta$  values are given in ppm, and coupling constants ( $J$ ) in Hz. HR-MS were obtained on a Q-TOF micro spectrometer.

### Typical procedure: 1-Oxo-1-phenylethyl 4-Methylbenzenesulfonate (Scheme 2, 3aa).

A mixture of phenylacetylene (**1a**) (204 mg, 2.0 mmol),  $\text{TsOH}\cdot\text{H}_2\text{O}$  (**2a**) (380 mg, 2.0 mmol), PIDA (837 mg, 2.6 mmol), and  $\text{CH}_3\text{CN}$  (2.0 mL) was added successively in a round-bottom flask, and the resulting solution was stirred for 24 h at room temperature. The mixture was purified by column chromatography on silica gel to afford product **3aa** with PE/ethyl acetate = 10/1 as the eluent.

### Procedure for the $^{18}\text{O}$ -labeled control experiment.

A mixture of phenylacetylene (**1a**) (204 mg, 2.0 mmol),  $\text{TsOH}\cdot\text{H}_2\text{O}$  (**2a**) (380 mg, 2.0 mmol), PIDA (837 mg, 2.6 mmol),  $\text{CH}_3\text{CN}$  (2.0 mL) and  $\text{H}_2^{18}\text{O}$  (0.1 mL, 98% in water) was added successively in a round-bottom flask, and the resulting solution was stirred for 24 h at room temperature. The mixture was purified by column chromatography on silica gel to afford product **3aa** with PE/ethyl acetate = 10/1 as the eluent.

### 1-Oxo-1-phenylethyl 4-Methylbenzenesulfonate (Scheme 2, 3aa) <sup>[1]</sup>

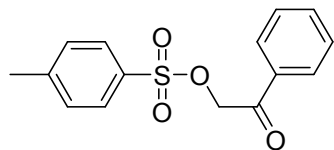

Yield: 79%; <sup>1</sup>H NMR (CDCl<sub>3</sub>, 400 Hz) δ 7.83 (m, 4H), 7.60 (t, *J* = 7.2 Hz, 1H), 7.44 (t, *J* = 7.6 Hz, 2H), 7.32 (d, *J* = 8.0 Hz, 2H), 5.26 (s, 2H), 2.44 (s, 3H); <sup>13</sup>C NMR (CDCl<sub>3</sub>, 100 Hz) δ 190.3, 145.3, 134.2, 133.7, 132.6, 129.9, 128.9, 128.1, 127.9, 69.9, 21.6.

### 1-Oxo-p-tolylethyl 4-Methylbenzenesulfonate (Scheme 2, 3ba) <sup>[2]</sup>

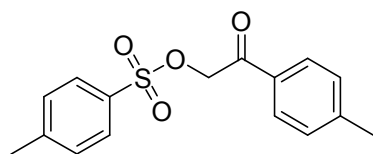

Yield: 79%; <sup>1</sup>H NMR (CDCl<sub>3</sub>, 400 Hz) δ 7.87 (d, *J* = 8.4 Hz, 2H), 7.75 (d, *J* = 8.4 Hz, 2H), 7.36 (d, *J* = 8.0 Hz, 2H), 7.27 (d, *J* = 8.0 Hz, 2H), 5.25 (s, 2H), 2.46 (s, 3H), 2.42 (s, 3H); <sup>13</sup>C NMR (CDCl<sub>3</sub>, 100 Hz) δ 189.8, 145.3, 145.2, 132.7, 131.3, 129.9, 129.6, 128.2, 128.1, 69.9, 21.7, 21.6.

### 1-Oxo-m-tolylethyl 4-Methylbenzenesulfonate (Scheme 2, 3ca) <sup>[3]</sup>

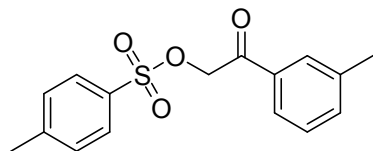

Yield: 73%; <sup>1</sup>H NMR (CDCl<sub>3</sub>, 400 Hz) δ 7.85 (d, *J* = 8.4 Hz, 2H), 7.62 (d, *J* = 8.4 Hz, 1H), 7.41 (d, *J* = 8.0 Hz, 1H), 7.34 (m, 3H), 5.26 (s, 2H), 2.45 (s, 3H), 2.39 (s, 3H); <sup>13</sup>C NMR (CDCl<sub>3</sub>, 100 Hz) δ 190.4, 145.2, 138.8, 135.0, 133.7, 132.7, 129.9, 128.7, 128.4, 128.1, 125.1, 69.9, 21.6, 21.3.

### 1-(4-Ethylphenyl)-1-oxoethyl 4-Methylbenzenesulfonate (Scheme 2, 3da)

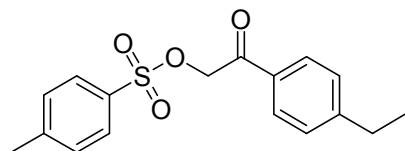

Yield: 80%; Orange oily liquid; <sup>1</sup>H NMR (CDCl<sub>3</sub>, 400 Hz) δ 7.86 (d, *J* = 8.4 Hz, 2H), 7.77 (d, *J* = 8.4 Hz, 2H), 7.34 (d, *J* = 8.0 Hz, 2H), 7.29 (d, *J* = 8.0 Hz, 2H), 5.24 (s, 2H), 2.71 (q, *J* = 7.2 Hz, 2H), 2.45 (s, 3H), 1.25 (t, *J* = 7.2 Hz, 3H); <sup>13</sup>C NMR (CDCl<sub>3</sub>, 100 Hz) δ 189.8, 151.4, 145.2, 132.6, 131.4, 129.8, 128.4, 128.2, 128.1, 69.9, 29.0, 21.6, 15.1; HRMS (ESI): calcd for C<sub>17</sub>H<sub>19</sub>O<sub>4</sub>S: [M+H<sup>+</sup>] 319.0999, found 319.0994.

### 1-(4-Propylphenyl)-1-oxoethyl 4-Methylbenzenesulfonate (Scheme 2, 3ea)

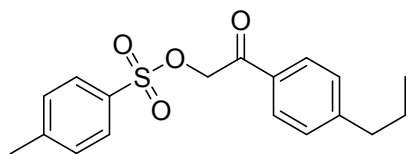

Yield: 84%; Orange oily liquid;  $^1\text{H NMR}$  ( $\text{CDCl}_3$ , 400 Hz)  $\delta$  7.85 (d,  $J = 8.4$  Hz, 2H), 7.76 (d,  $J = 8.4$  Hz, 2H), 7.34 (d,  $J = 8.0$  Hz, 2H), 7.26 (d,  $J = 8.0$  Hz, 2H), 5.24 (s, 2H), 2.63 (t,  $J = 7.2$  Hz, 2H), 2.45 (s, 3H), 1.64 (m,  $J = 7.2$  Hz, 2H), 0.93 (t,  $J = 7.2$  Hz, 3H);  $^{13}\text{C NMR}$  ( $\text{CDCl}_3$ , 100 Hz)  $\delta$  189.8, 149.9, 145.2, 132.7, 131.5, 129.9, 129.0, 128.2, 128.1, 69.9, 38.0, 24.1, 21.6, 13.7; HRMS (ESI): calcd for  $\text{C}_{18}\text{H}_{21}\text{O}_4\text{S}$ :  $[\text{M}+\text{H}^+]$  333.1155, found 333.1161.

### 1-(4-Tert-butylphenyl)-1-oxoethyl 4-Methylbenzenesulfonate (Scheme 2, 3fa)

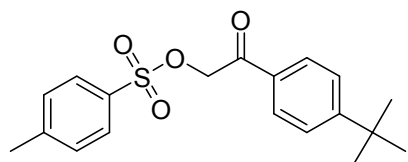

Yield: 81%; Orange oily liquid;  $^1\text{H NMR}$  ( $\text{CDCl}_3$ , 400 Hz)  $\delta$  7.85 (d,  $J = 8.4$  Hz, 2H), 7.78 (d,  $J = 8.4$  Hz, 1H), 7.48 (d,  $J = 8.0$  Hz, 2H), 7.35 (d,  $J = 8.0$  Hz, 2H), 5.25 (s, 2H), 2.45 (s, 3H), 1.33 (s, 9H);  $^{13}\text{C NMR}$  ( $\text{CDCl}_3$ , 100 Hz)  $\delta$  189.8, 158.2, 145.2, 132.7, 131.2, 129.9, 128.1, 127.9, 125.8, 69.9, 35.2, 30.9, 21.6; HRMS (ESI): calcd for  $\text{C}_{19}\text{H}_{23}\text{O}_4\text{S}$ :  $[\text{M}+\text{H}^+]$  347.1312, found 347.1318.

### 1-(4-Fluorophenyl)-1-oxoethyl 4-Methylbenzenesulfonate (Scheme 2, 3ga)<sup>[4]</sup>

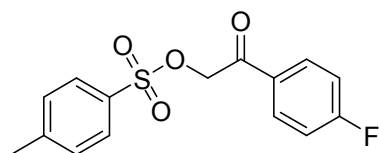

Yield: 73%;  $^1\text{H NMR}$  ( $\text{CDCl}_3$ , 400 Hz)  $\delta$  7.87 (dd,  $J = 5.6$  Hz,  $J = 8.8$  Hz, 2H), 7.83 (d,  $J = 8.4$  Hz, 2H), 7.35 (d,  $J = 8.0$  Hz, 2H), 7.14 (m, 2H), 5.21 (s, 2H), 2.44 (s, 3H);  $^{13}\text{C NMR}$  ( $\text{CDCl}_3$ , 100 Hz)  $\delta$  189.0, 166.26 (d,  $^1J = 255.6$  Hz), 145.4, 132.5, 130.8 (d,  $^3J = 9.5$  Hz), 130.2 (d,  $^4J = 3.1$  Hz), 129.9, 128.1, 116.2 (d,  $^2J = 22.0$  Hz), 69.8, 21.6.

### 1-(4-Chlorophenyl)-1-oxoethyl 4-Methylbenzenesulfonate (Scheme 2, 3ha)<sup>[2]</sup>

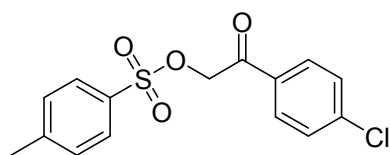

Yield: 72%;  $^1\text{H NMR}$  ( $\text{CDCl}_3$ , 400 Hz)  $\delta$  7.84 (d,  $J = 8.4$  Hz, 2H), 7.79 (d,  $J = 8.4$  Hz, 1H), 7.45 (d,  $J =$

8.0 Hz, 2H), 7.35 (d,  $J = 8.0$  Hz, 2H), 5.20 (s, 2H), 2.46 (s, 3H);  $^{13}\text{C}$  NMR ( $\text{CDCl}_3$ , 100 Hz)  $\delta$  189.4, 145.4, 140.8, 132.5, 132.1, 129.9, 129.5, 129.3, 128.1, 69.8, 21.7.

**1-(2-Bromophenyl)-1-oxoethyl 4-Methylbenzenesulfonate (Scheme 2, 3ia)** <sup>[5]</sup>

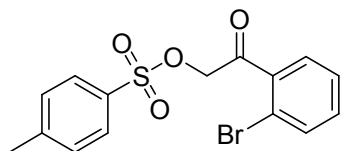

Yield: 59%;  $^1\text{H}$  NMR ( $\text{CDCl}_3$ , 400 Hz)  $\delta$  7.81 (d,  $J = 8.4$  Hz, 2H), 7.61 (d,  $J = 8.4$  Hz, 1H), 7.38 (m, 5H), 5.13 (s, 2H), 2.46 (s, 3H);  $^{13}\text{C}$  NMR ( $\text{CDCl}_3$ , 100 Hz)  $\delta$  194.8, 145.3, 133.7, 132.8, 129.9, 129.6, 128.1, 127.5, 119.4, 71.0, 21.7.

**1-(4-Methoxyphenyl)-1-oxoethyl 4-Methylbenzenesulfonate (Scheme 2, 3ja)** <sup>[2]</sup>

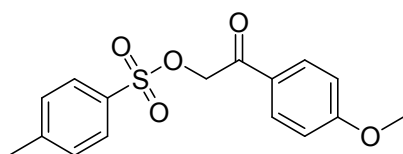

Yield: 86%;  $^1\text{H}$  NMR ( $\text{CDCl}_3$ , 400 Hz)  $\delta$  7.84 (d,  $J = 8.4$  Hz, 2H), 7.82 (d,  $J = 8.4$  Hz, 1H), 7.35 (d,  $J = 8.0$  Hz, 2H), 6.93 (d,  $J = 8.0$  Hz, 2H), 5.20 (s, 2H), 3.88 (s, 3H), 2.45 (s, 3H);  $^{13}\text{C}$  NMR ( $\text{CDCl}_3$ , 100 Hz)  $\delta$  188.7, 164.3, 145.2, 130.4, 129.8, 128.1, 126.8, 114.1, 69.7, 55.5, 21.6.

**1-(Methoxycarbonyl)-2-oxo-2-phenylethyl 4-Methylbenzenesulfonate (Scheme 2, 3ka)** <sup>[6]</sup>

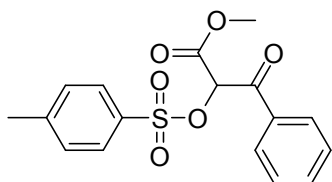

Yield: 85%;  $^1\text{H}$  NMR ( $\text{CDCl}_3$ , 400 Hz)  $\delta$  7.74 (d,  $J = 8.4$  Hz, 2H), 7.43 (d,  $J = 8.4$  Hz, 2H), 7.35 (t,  $J = 8.0$  Hz, 1H), 7.24 (m, 4H), 6.12 (s, 1H), 3.70 (s, 3H), 2.41 (s, 3H);  $^{13}\text{C}$  NMR ( $\text{CDCl}_3$ , 100 Hz)  $\delta$  193.7, 163.8, 155.7, 145.2, 133.0, 130.8, 129.4, 128.5, 128.4, 126.9, 110.4, 51.7, 21.6.

**1-Oxo-1-phenylpentan-2-yl 4-Methylbenzenesulfonate (Scheme 2, 3la)** <sup>[7]</sup>

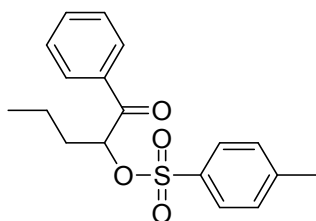

Yield: 83%;  $^1\text{H}$  NMR ( $\text{CDCl}_3$ , 400 Hz)  $\delta$  7.85 (d,  $J = 8.4$  Hz, 2H), 7.34 (d,  $J = 8.4$  Hz, 2H), 7.57 (t,  $J = 8.0$  Hz, 1H), 7.45 (t,  $J = 8.0$  Hz, 2H), 7.23 (d,  $J = 8.4$  Hz, 2H), 6.61 (q,  $J = 8.4$  Hz, 1H), 2.40 (s, 3H),

1.85 (m, 2H), 1.41 (m, 2H), 0.90 (t,  $J = 7.2$  Hz, 3H);  $^{13}\text{C}$  NMR ( $\text{CDCl}_3$ , 100 Hz)  $\delta$  195.0, 144.9, 133.7, 129.8, 129.6, 128.7, 128.6, 128.1, 128.0, 81.6, 34.7, 21.6, 18.4, 13.3.

**1-Oxo-1-phenylethyl Methanesulfonate (Scheme 2, 3ab)** <sup>[8]</sup>

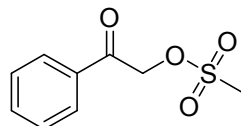

Yield: 87%;  $^1\text{H}$  NMR ( $\text{CDCl}_3$ , 400 Hz)  $\delta$  7.90 (d,  $J = 8.4$  Hz, 2H), 7.66 (t,  $J = 8.4$  Hz, 1H), 7.53 (t,  $J = 8.4$  Hz, 2H), 5.52 (s, 2H), 3.30 (s, 3H);  $^{13}\text{C}$  NMR ( $\text{CDCl}_3$ , 100 Hz)  $\delta$  190.9, 134.5, 129.7, 129.1, 127.8, 70.1, 39.2.

**1-Oxo-1-phenylethyl Ethanesulfonate (Scheme 2, 3ac)** <sup>[8]</sup>

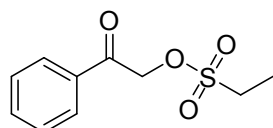

Yield: 85%;  $^1\text{H}$  NMR ( $\text{CDCl}_3$ , 400 Hz)  $\delta$  7.89 (d,  $J = 8.4$  Hz, 2H), 7.64 (t,  $J = 8.4$  Hz, 1H), 7.51 (t,  $J = 8.4$  Hz, 2H), 5.49 (s, 2H), 3.38 (q,  $J = 7.6$  Hz, 2H), 1.52 (t,  $J = 7.6$  Hz, 3H);  $^{13}\text{C}$  NMR ( $\text{CDCl}_3$ , 100 Hz)  $\delta$  191.3, 134.4, 133.5, 129.0, 127.8, 69.7, 46.5, 8.19.

**1-Oxo-1-phenylethyl Benzenesulfonate (Scheme 2, 3ad)** <sup>[8]</sup>

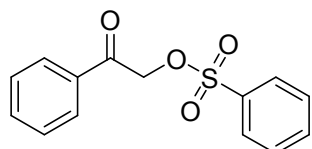

Yield: 82%;  $^1\text{H}$  NMR ( $\text{CDCl}_3$ , 400 Hz)  $\delta$  8.00 (d,  $J = 8.4$  Hz, 2H), 7.85 (d,  $J = 8.4$  Hz, 1H), 7.68 (t,  $J = 8.0$  Hz, 1H), 7.58 (m, 3H), 7.49 (t,  $J = 8.0$  Hz, 2H), 5.32 (s, 2H);  $^{13}\text{C}$  NMR ( $\text{CDCl}_3$ , 100 Hz)  $\delta$  190.1, 135.7, 134.2, 134.1, 133.7, 129.3, 128.9, 128.1, 128.0, 70.2.

**1-Oxo-1-phenylethyl 2-Naphthalenesulfonate (Scheme 2, 3ae)** <sup>[9]</sup>

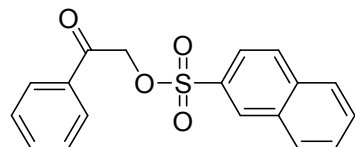

Yield: 81%;  $^1\text{H}$  NMR ( $\text{CDCl}_3$ , 400 Hz)  $\delta$  8.55 (s, 1H), 8.01 (m, 2H), 7.93 (d,  $J = 8.4$  Hz, 2H), 7.83 (d,  $J = 8.4$  Hz, 2H), 7.63 (m, 3H), 7.45 (m, 4H), 6.12 (t,  $J = 8.4$  Hz, 2H), 5.33 (s, 2H);  $^{13}\text{C}$  NMR ( $\text{CDCl}_3$ , 100 Hz)  $\delta$  189.3, 135.4, 134.2, 133.7, 132.4, 131.9, 130.3, 129.7, 129.5, 129.4, 128.9, 128.0, 128.0, 127.8, 122.6, 70.1.

## NMR spectra

### 1-Oxo-1-phenylethyl 4-Methylbenzenesulfonate (Scheme 2, 3aa)

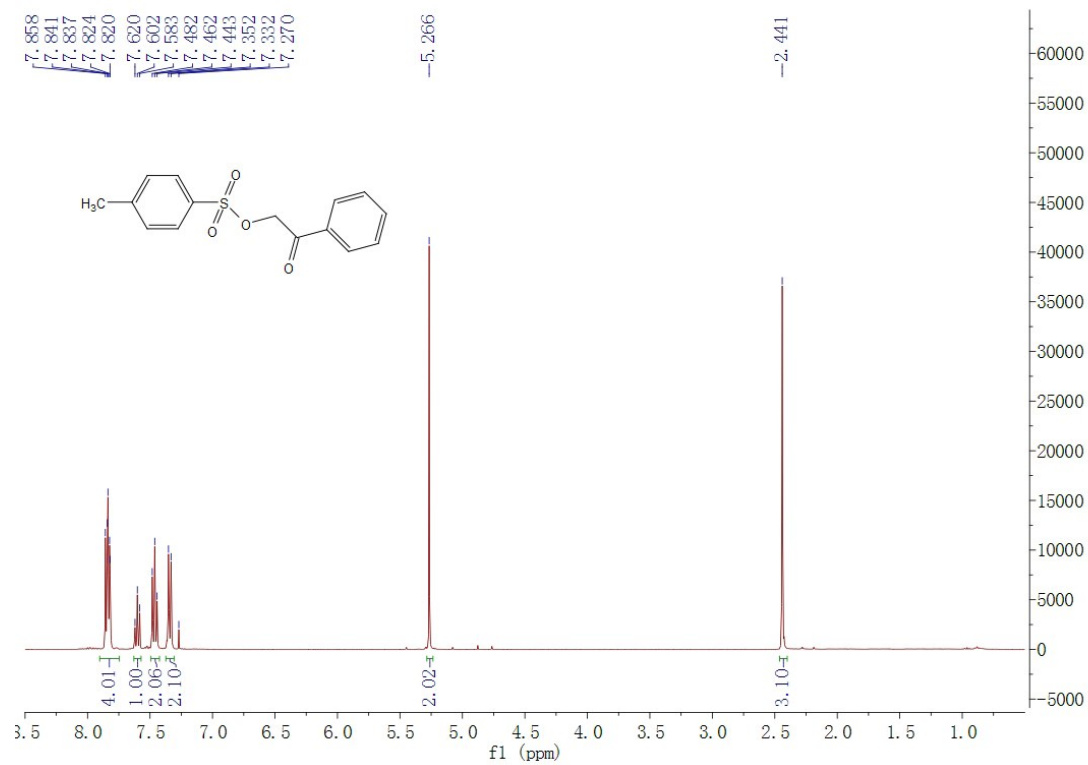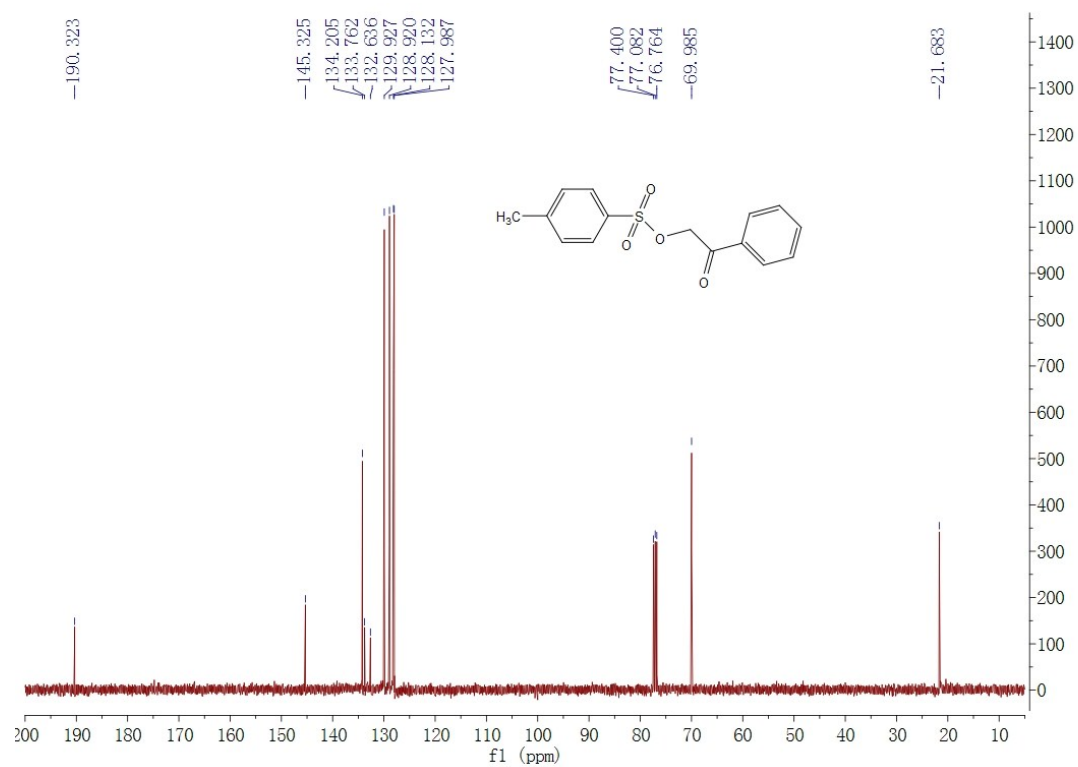

### 1-Oxo-p-tolyethyl 4-Methylbenzenesulfonate (Scheme 2, 3ba)

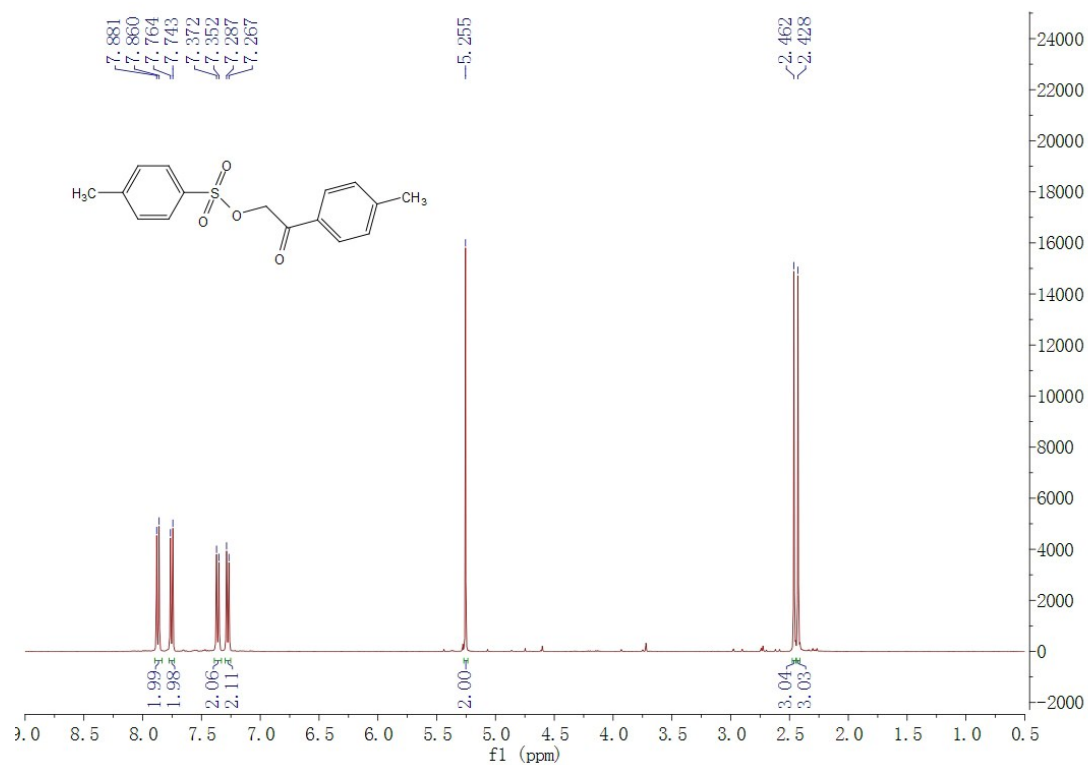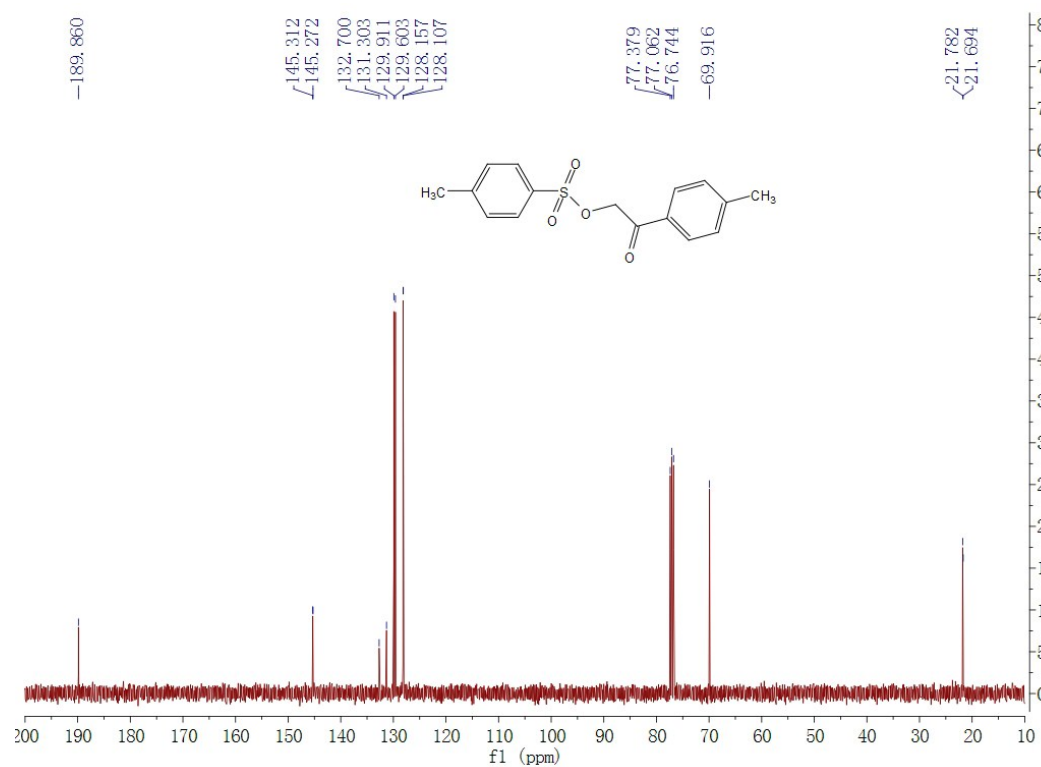

### 1-Oxo-m-tolyethyl 4-Methylbenzenesulfonate (Scheme 2, 3ca)

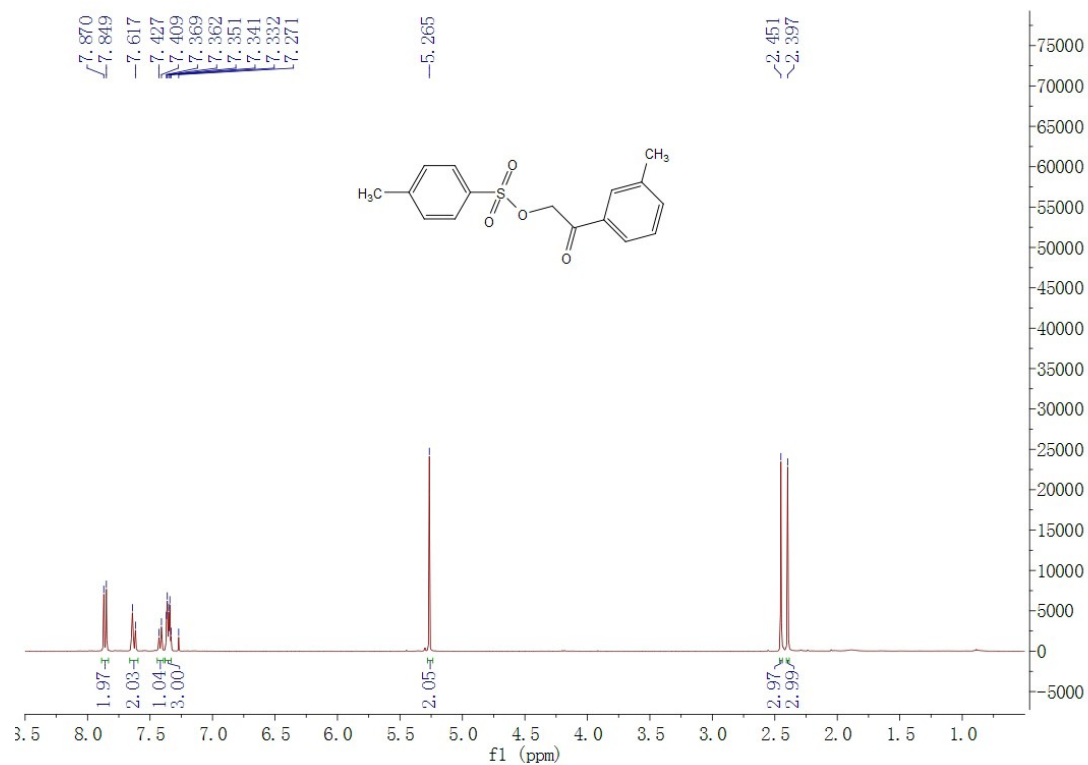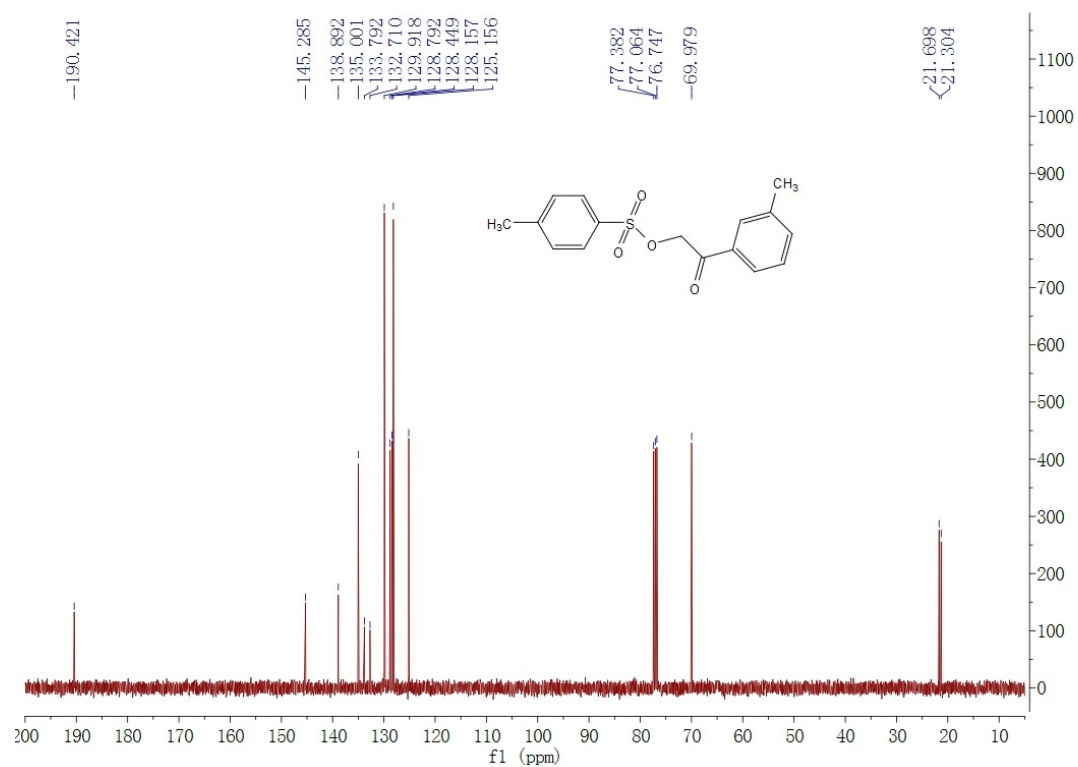



### 1-(4-Ethylphenyl)-1-oxoethyl 4-Methylbenzenesulfonate (Scheme 2, 3da)

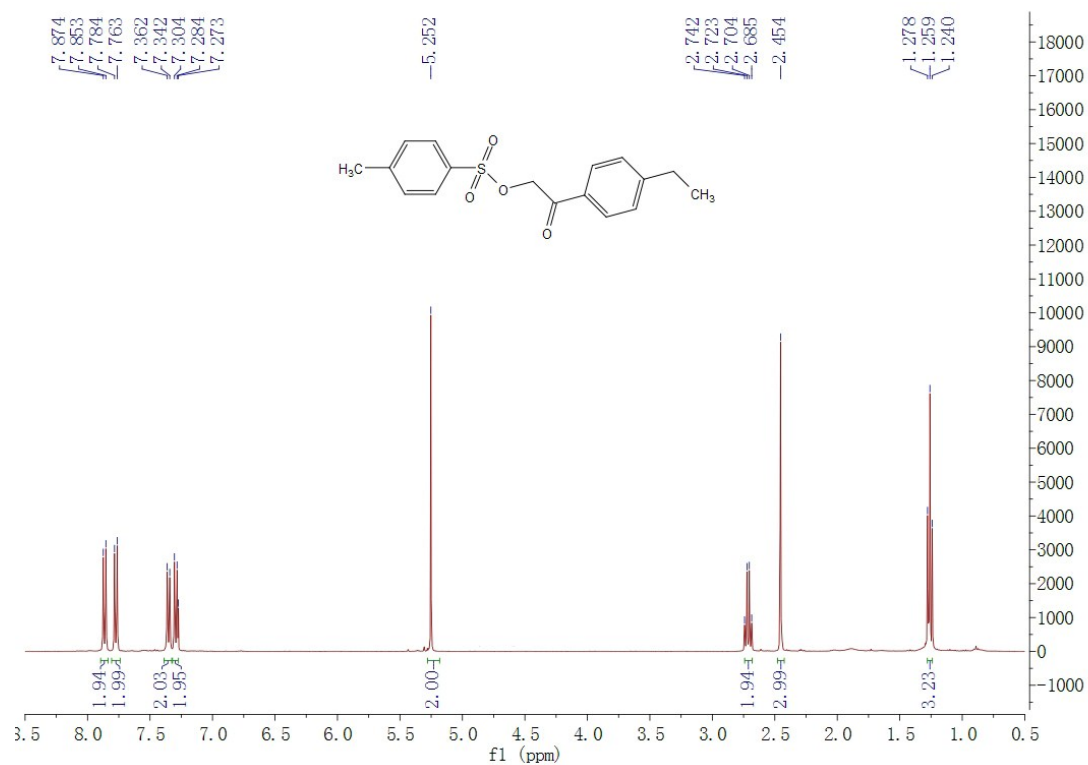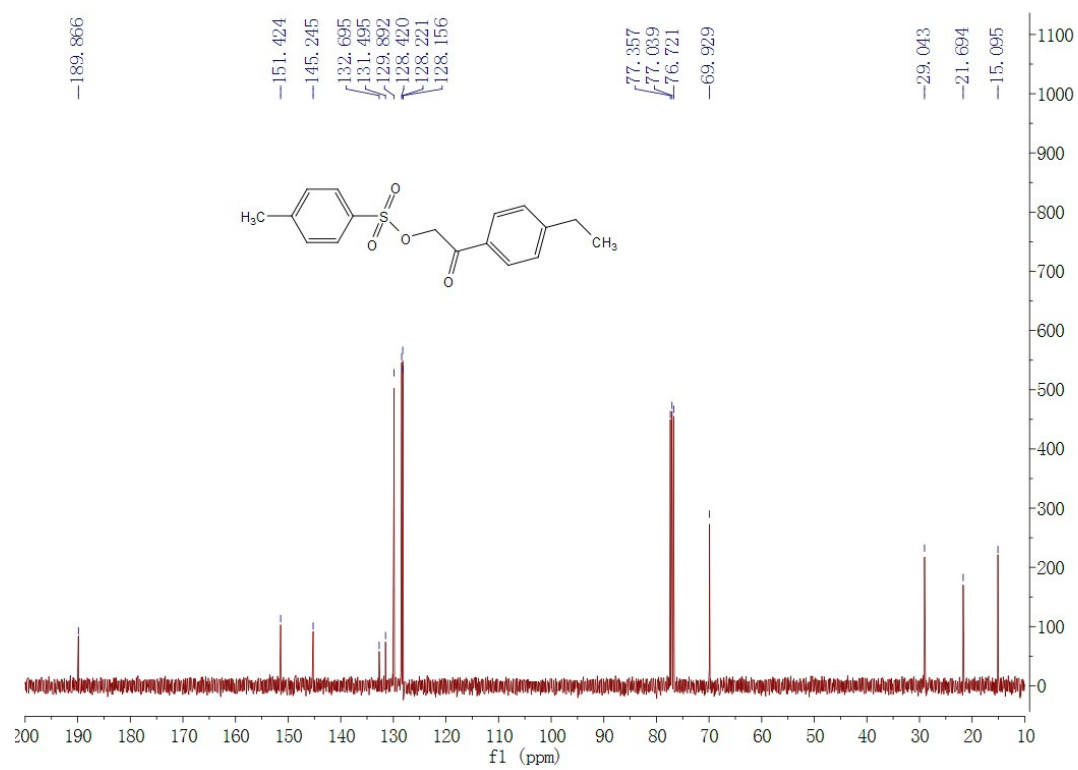

**1-(4-Propylphenyl)-1-oxoethyl 4-Methylbenzenesulfonate (Scheme 2, 3ea)**

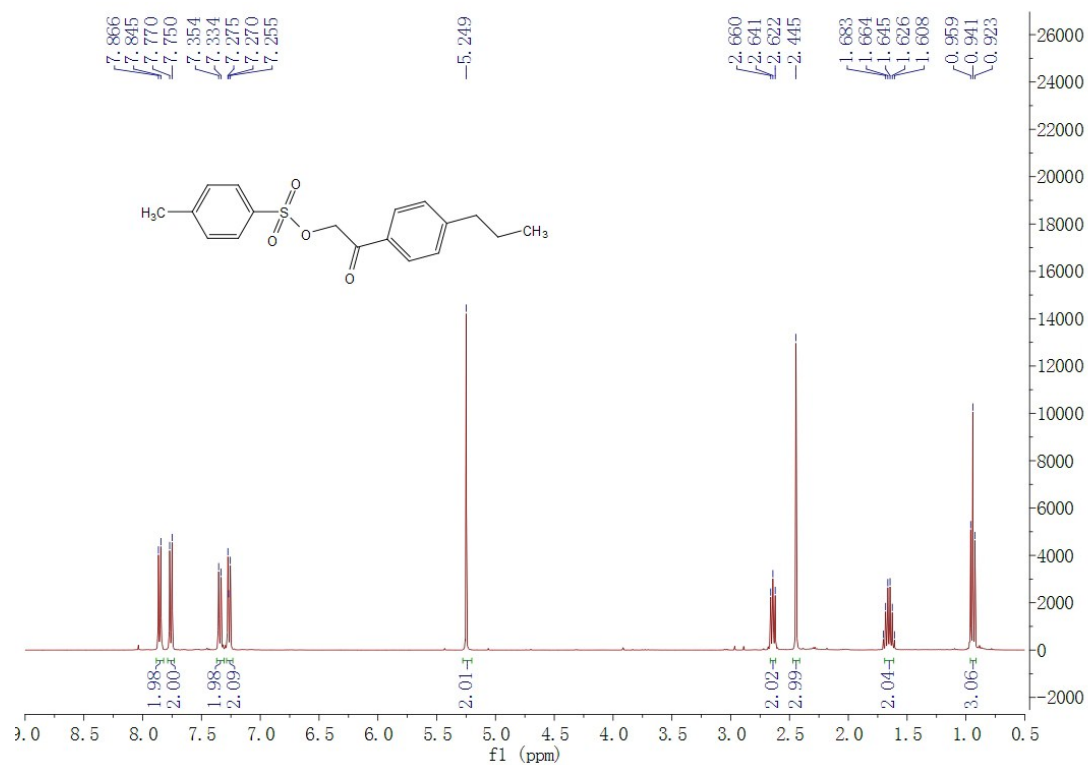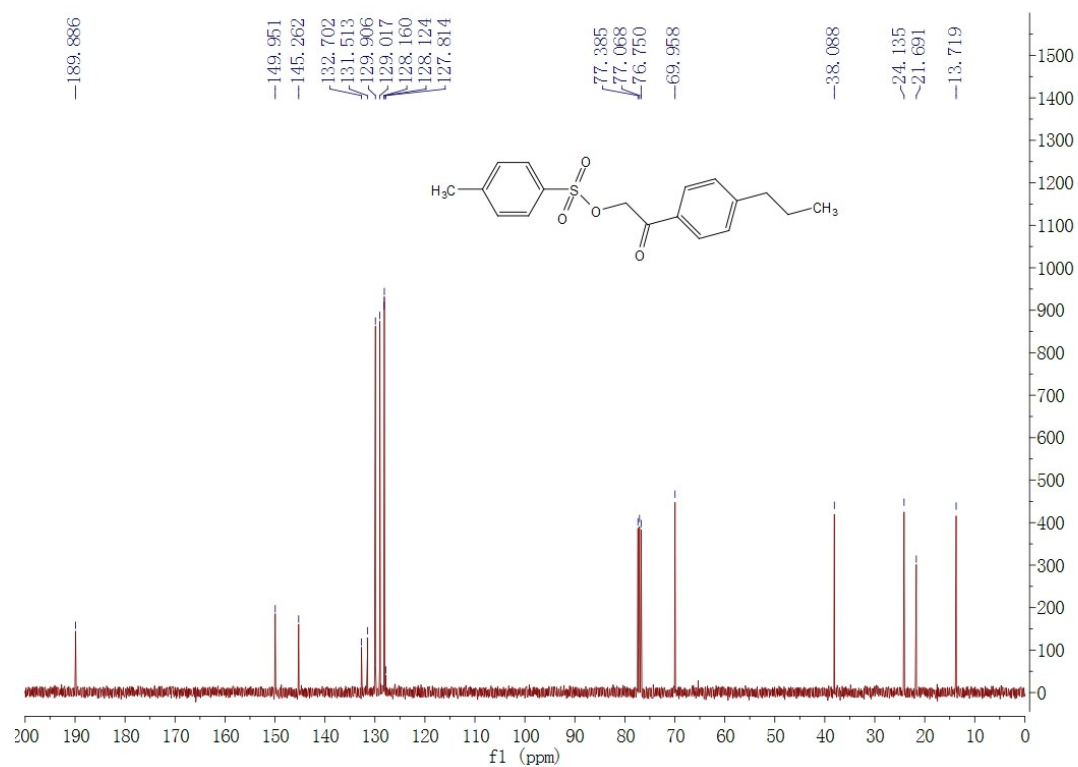

### 1-(4-Tert-butylphenyl)-1-oxoethyl 4-Methylbenzenesulfonate (Scheme 2, 3fa)

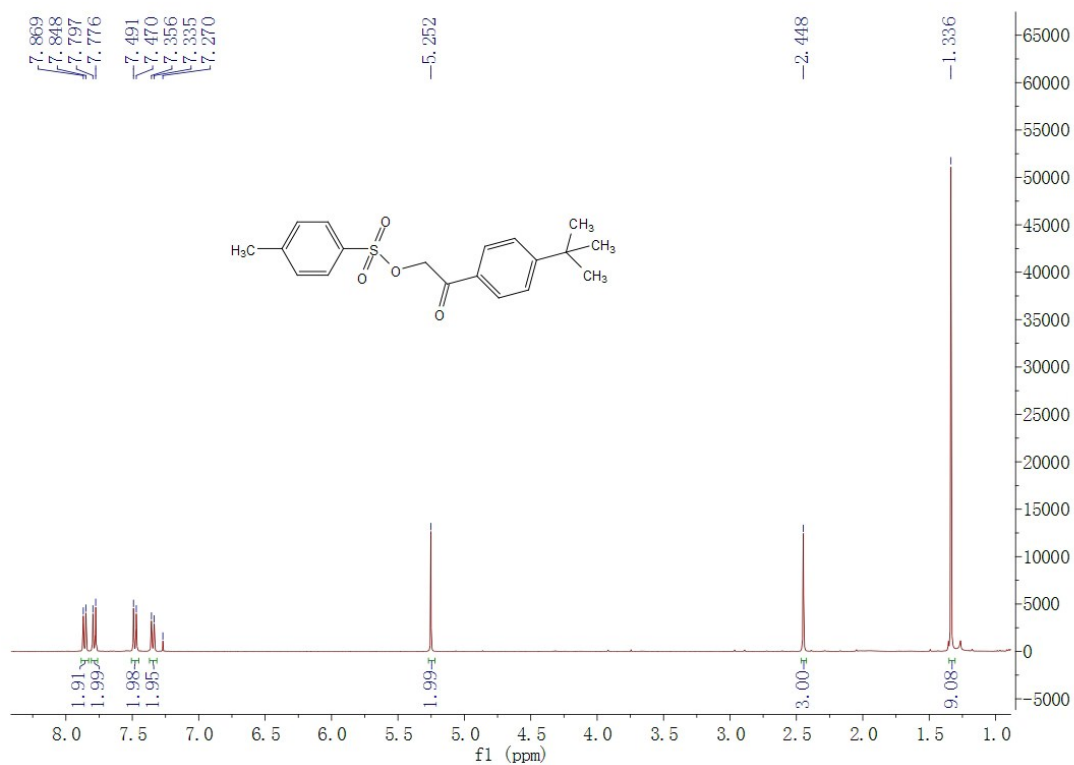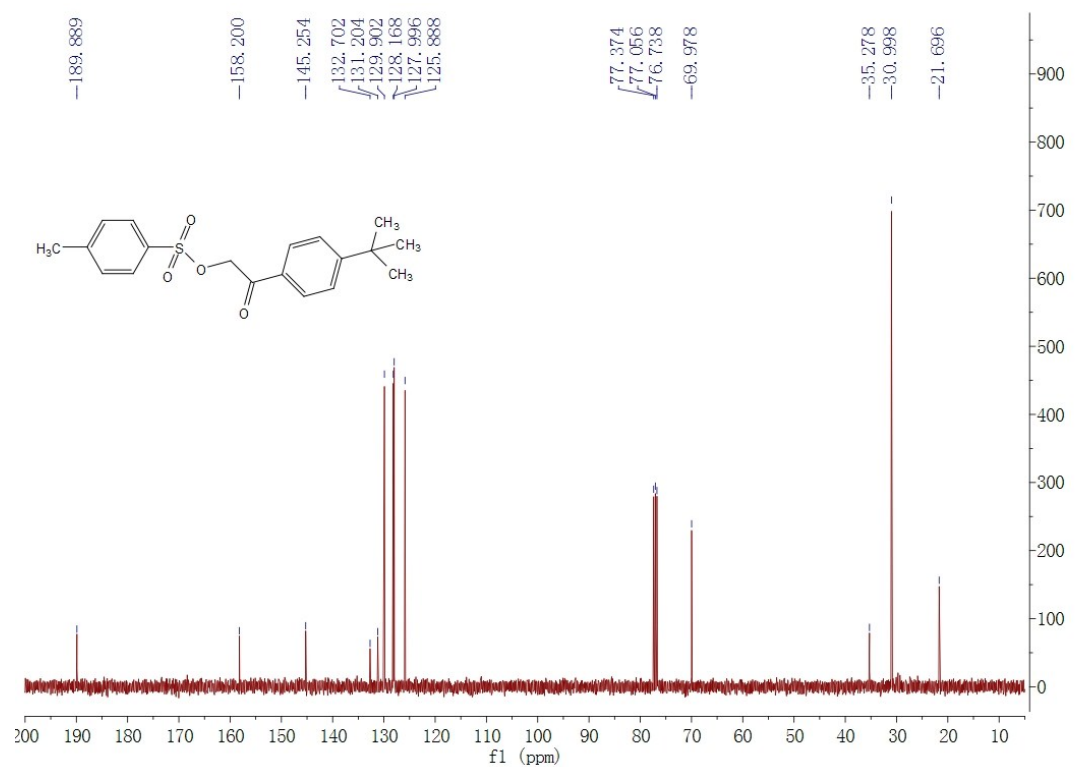

**1-(4-Fluorophenyl)-1-oxoethyl 4-Methylbenzenesulfonate (Scheme 2, 3ga)**

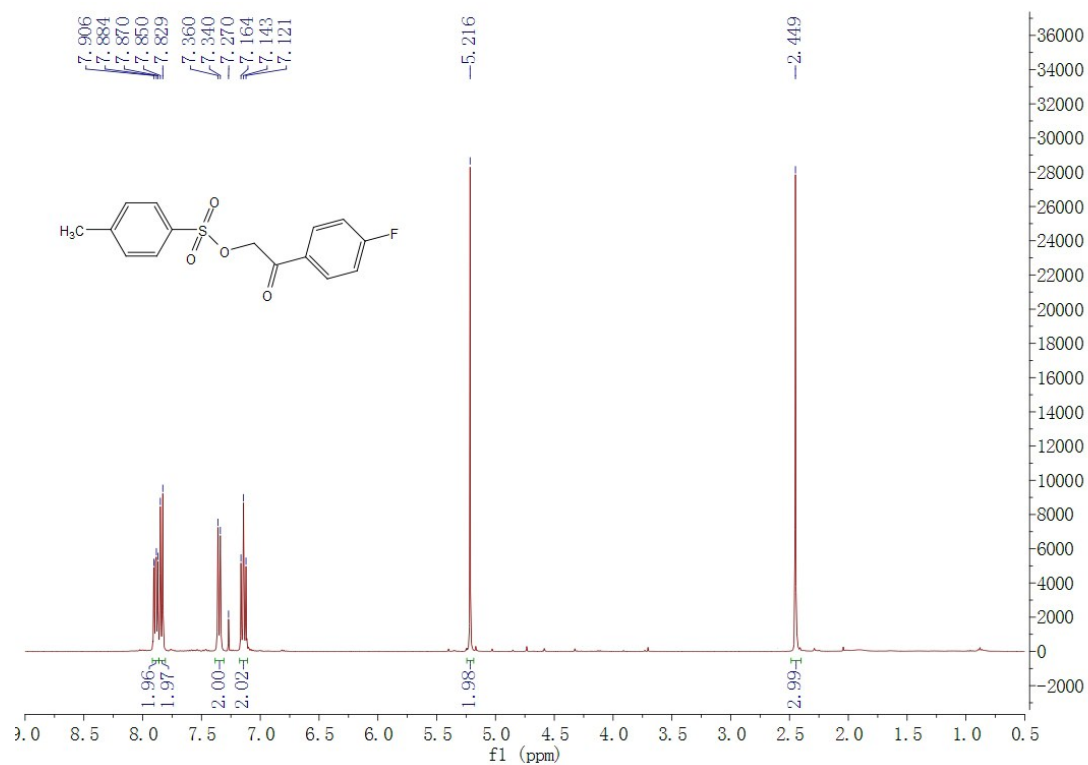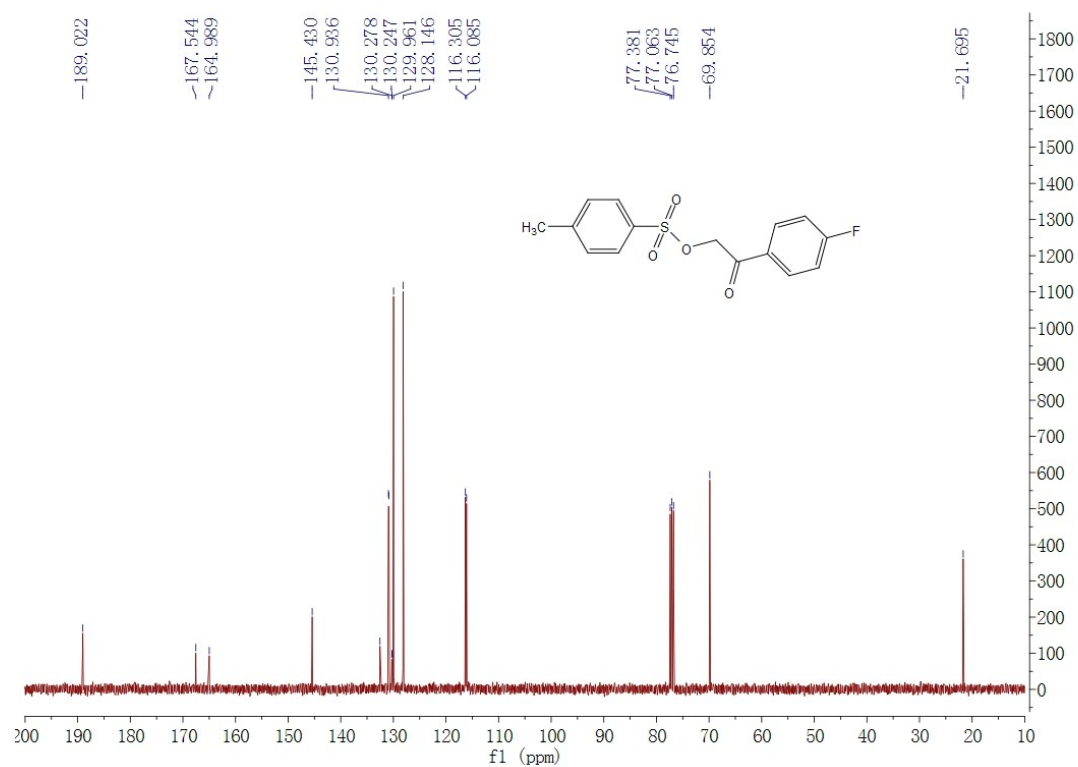

### 1-(4-Chlorophenyl)-1-oxoethyl 4-Methylbenzenesulfonate (Scheme 2, 3ha)

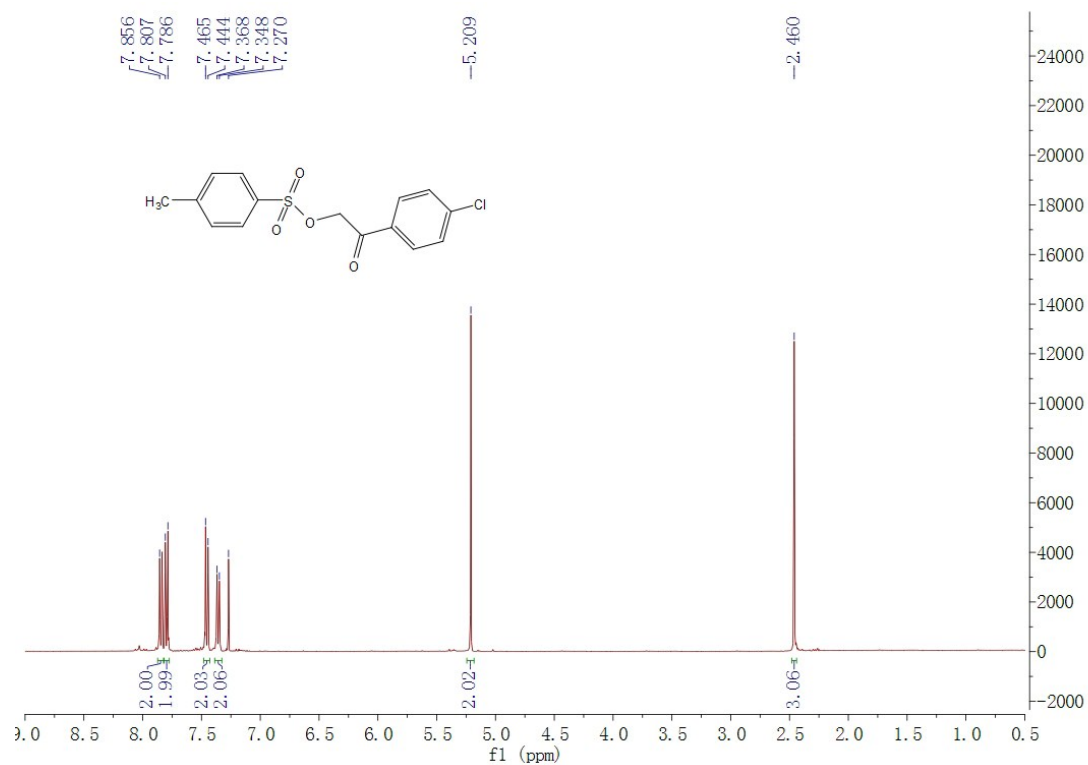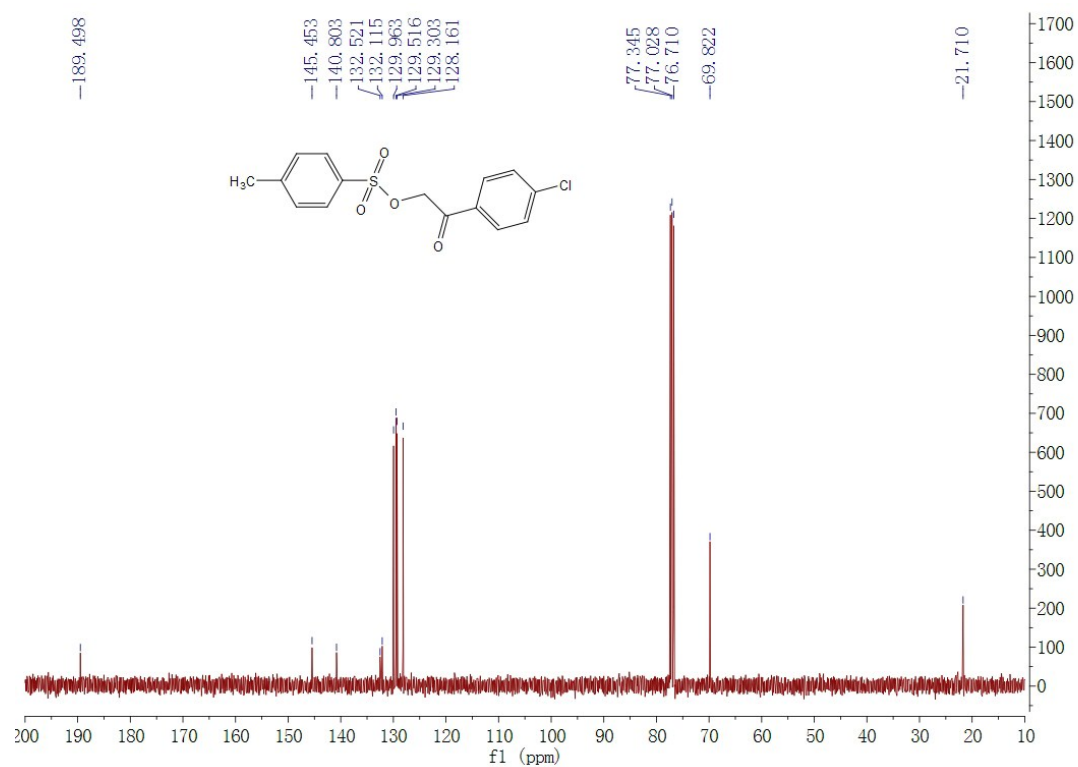

### 1-(2-Bromophenyl)-1-oxoethyl 4-Methylbenzenesulfonate (Scheme 2, 3ia)

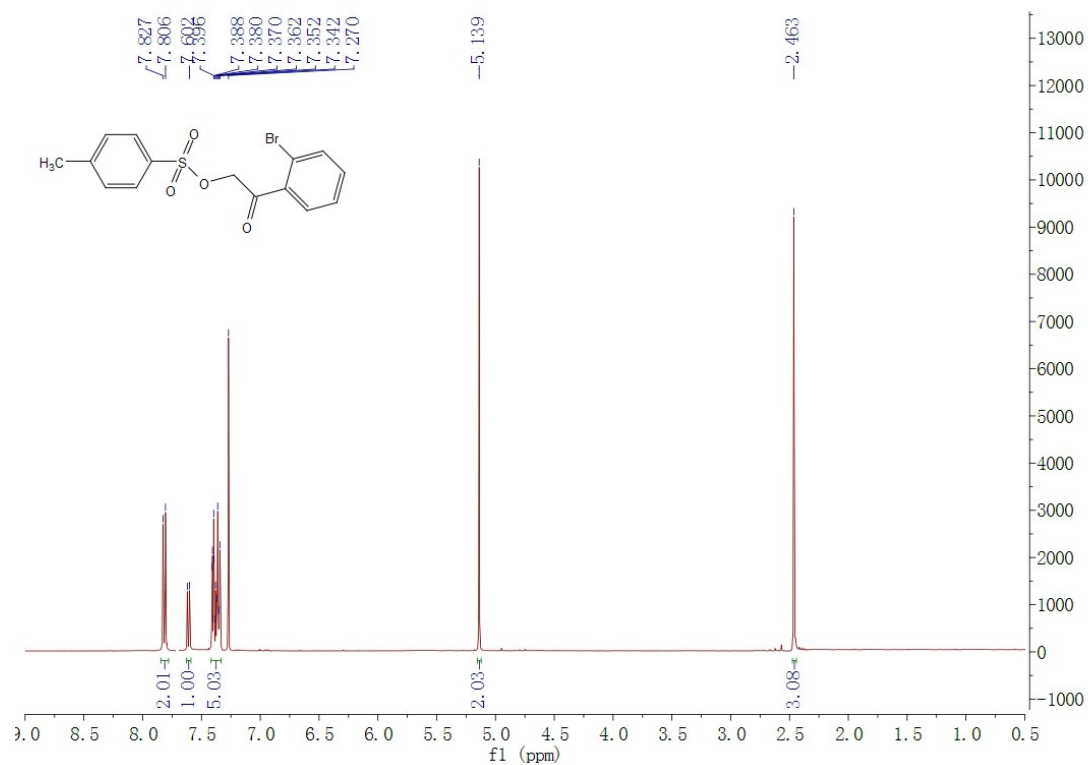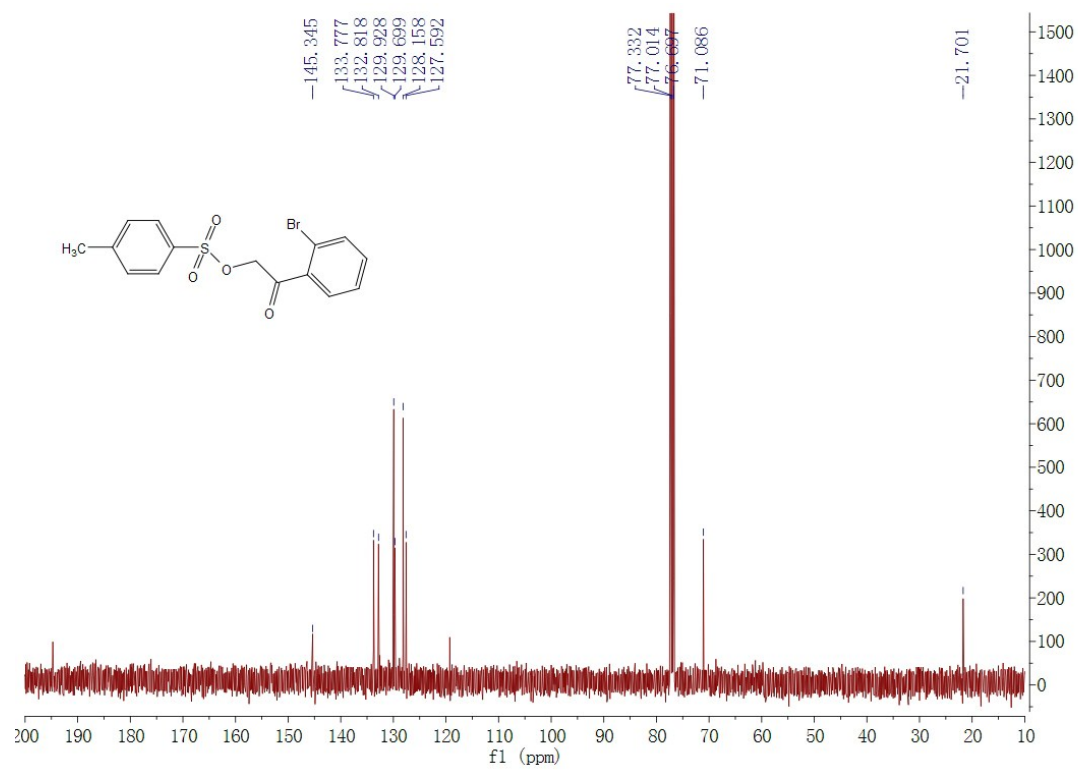

### 1-(4-Methoxyphenyl)-1-oxoethyl 4-Methylbenzenesulfonate (Scheme 2, 3ja)

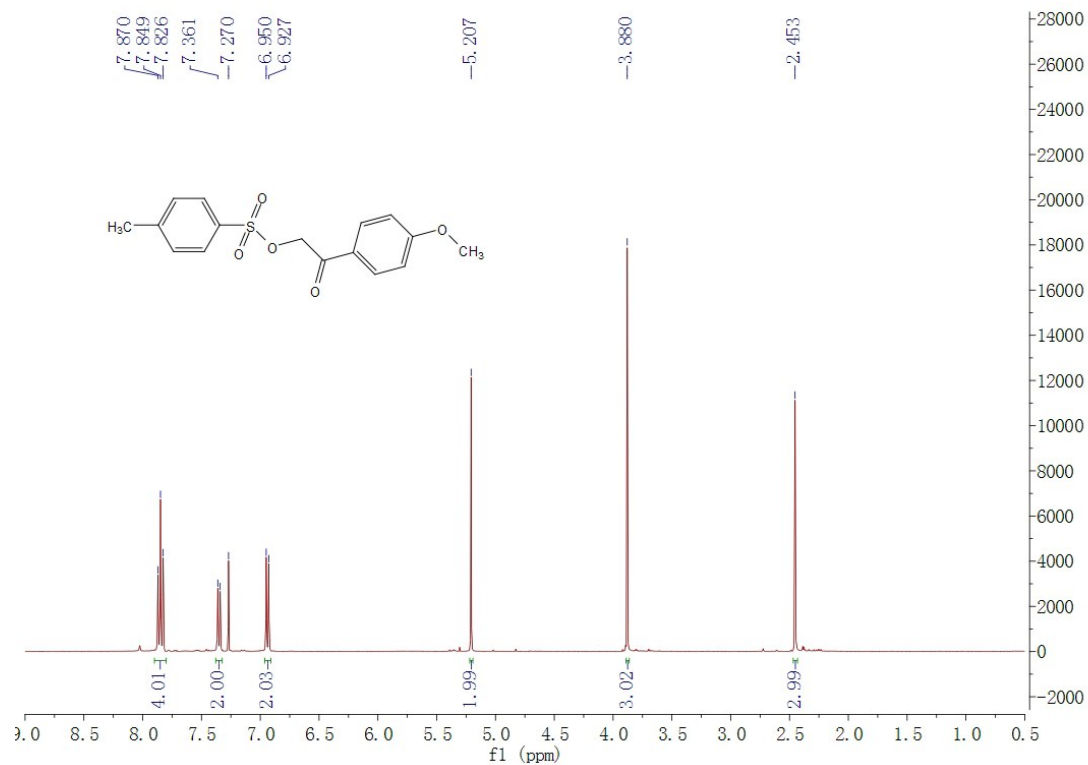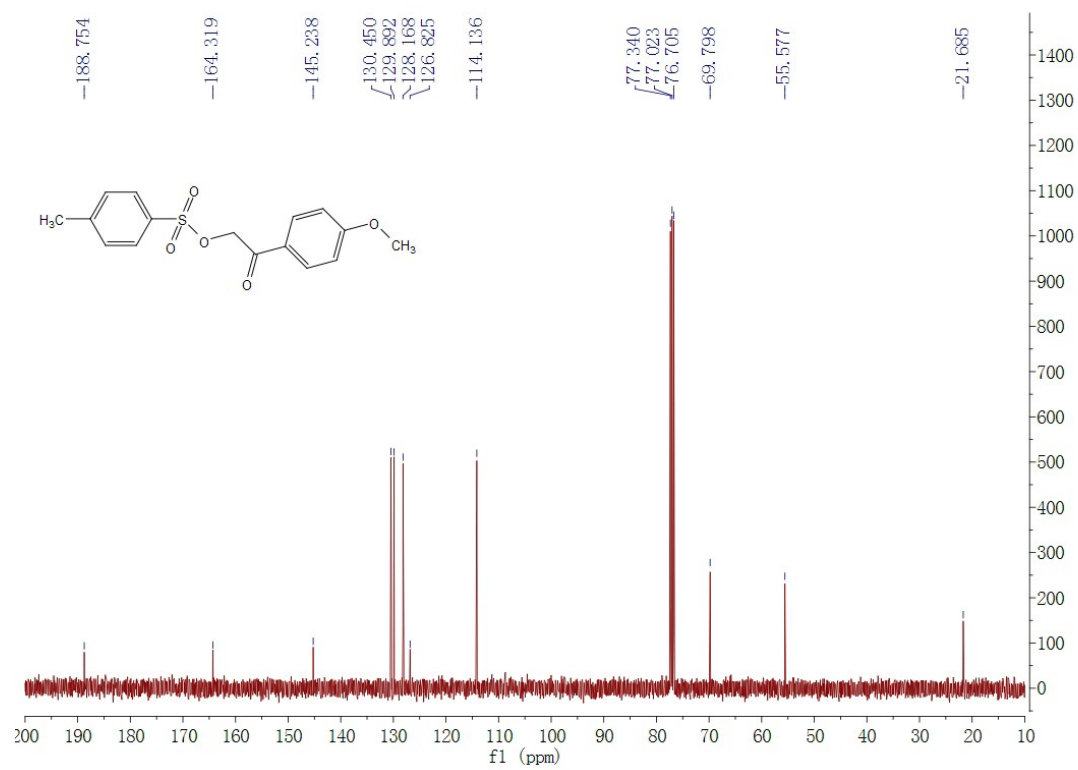

**1-(Methoxycarbonyl)-2-oxo-2-phenylethyl 4-Methylbenzenesulfonate (Scheme 2, 3ka)**

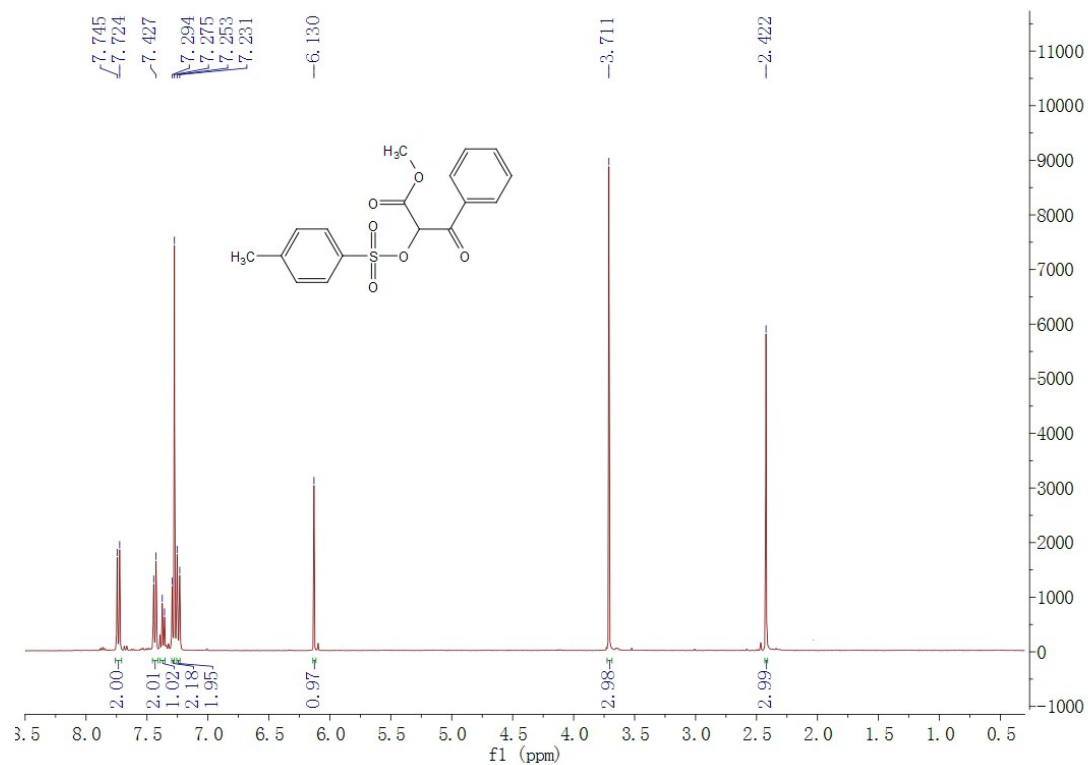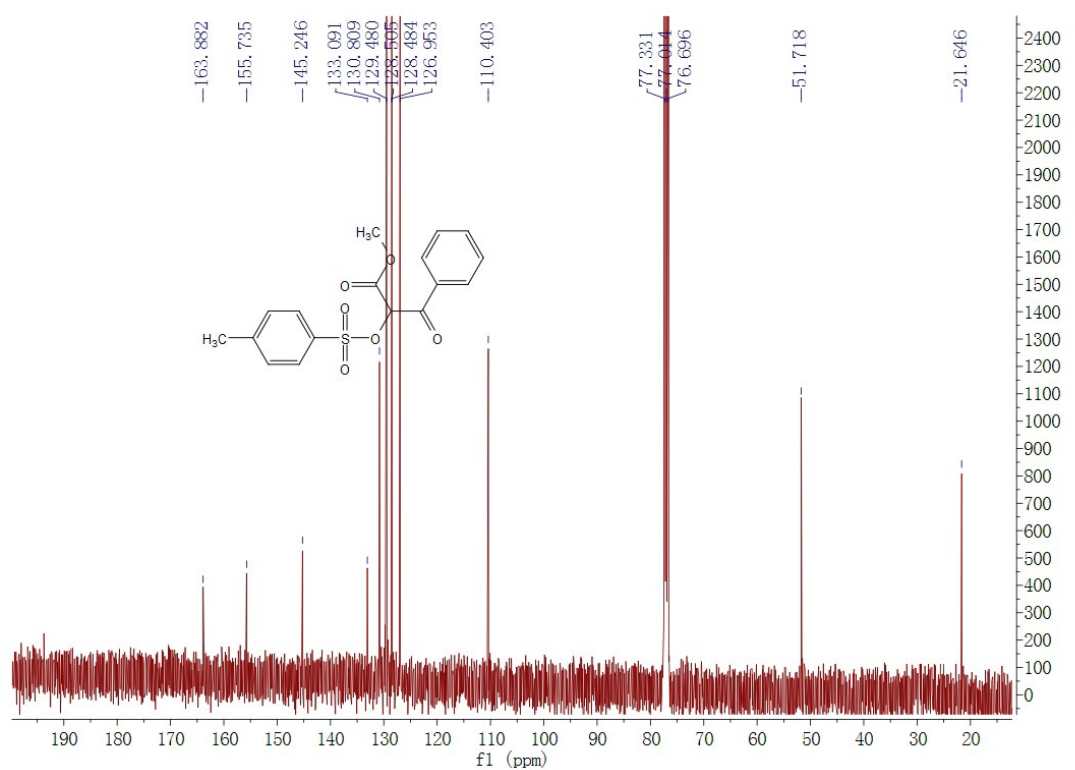



### 1-Oxo-1-phenylpentan-2-yl 4-Methylbenzenesulfonate (Scheme 2, 3la)

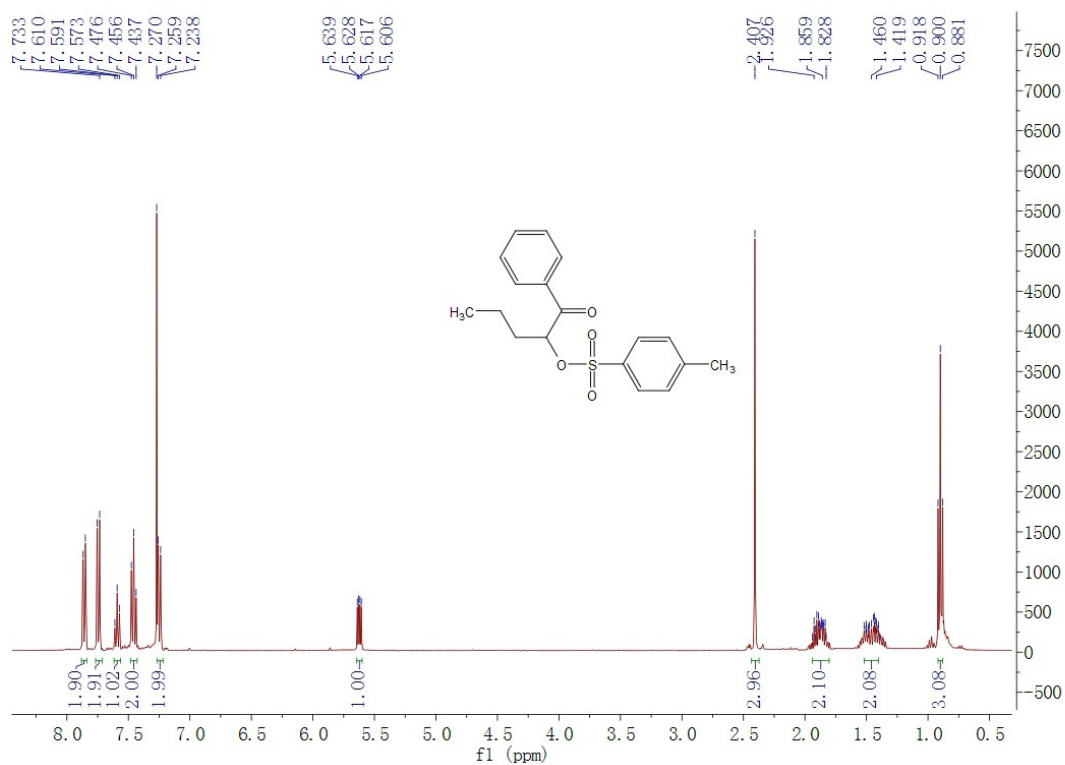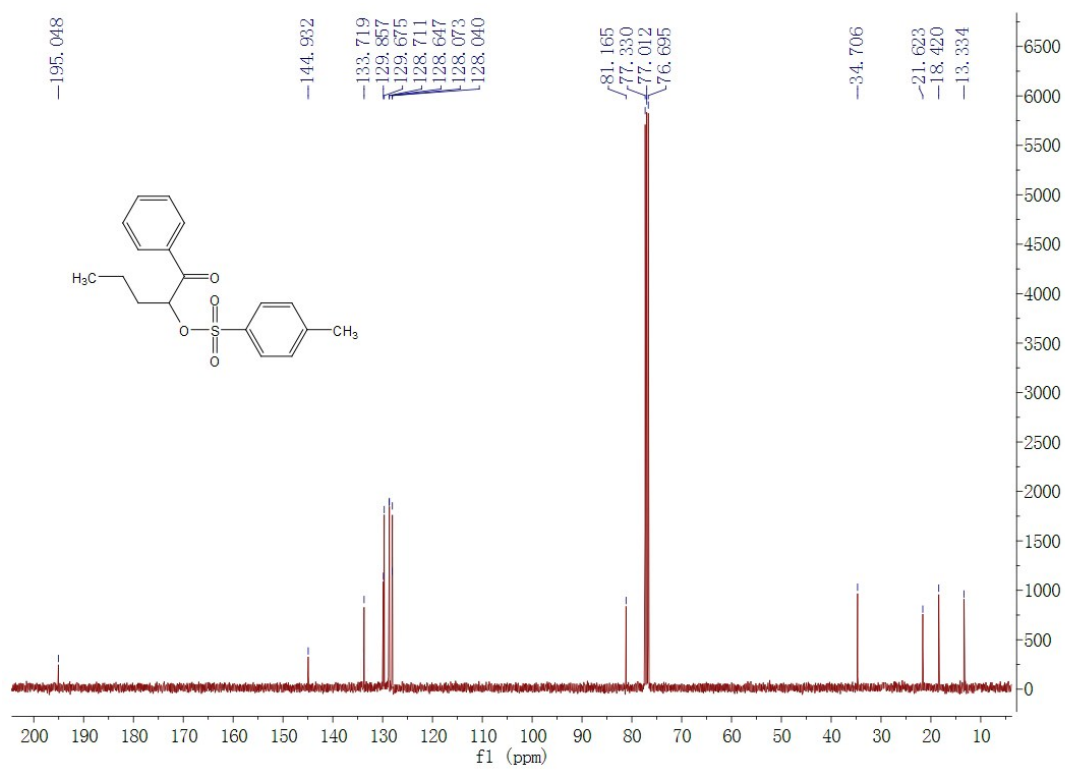

### 1-Oxo-1-phenylethyl Methanesulfonate (Scheme 2, 3ab)

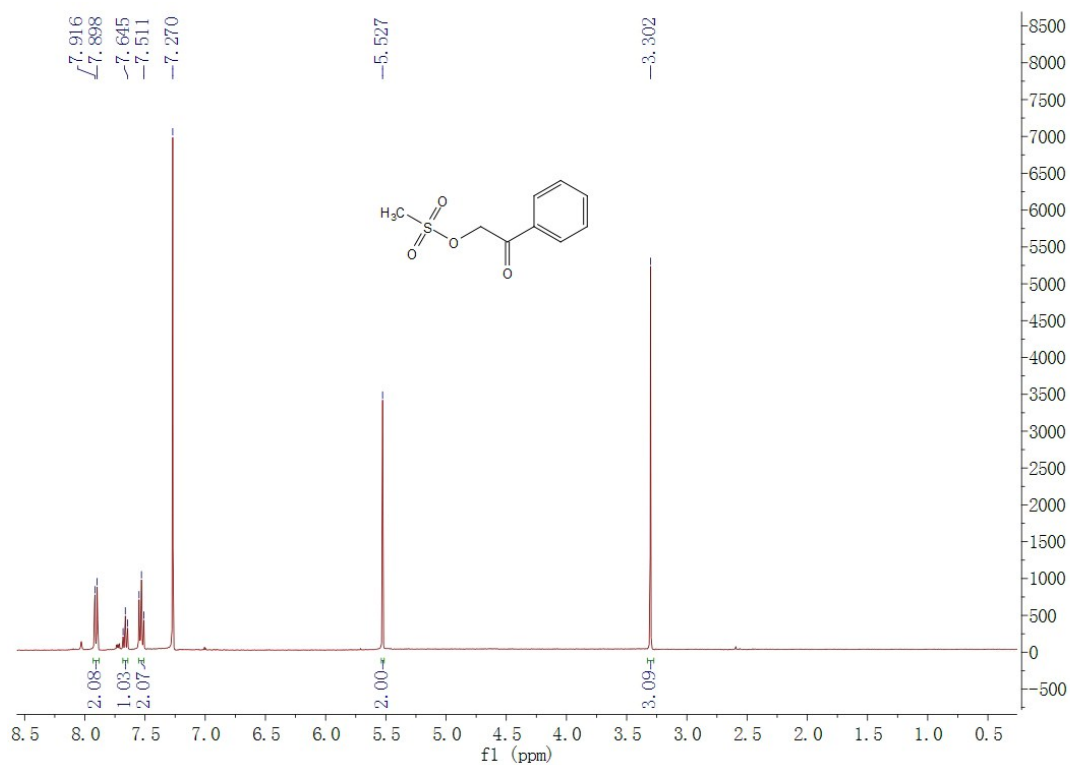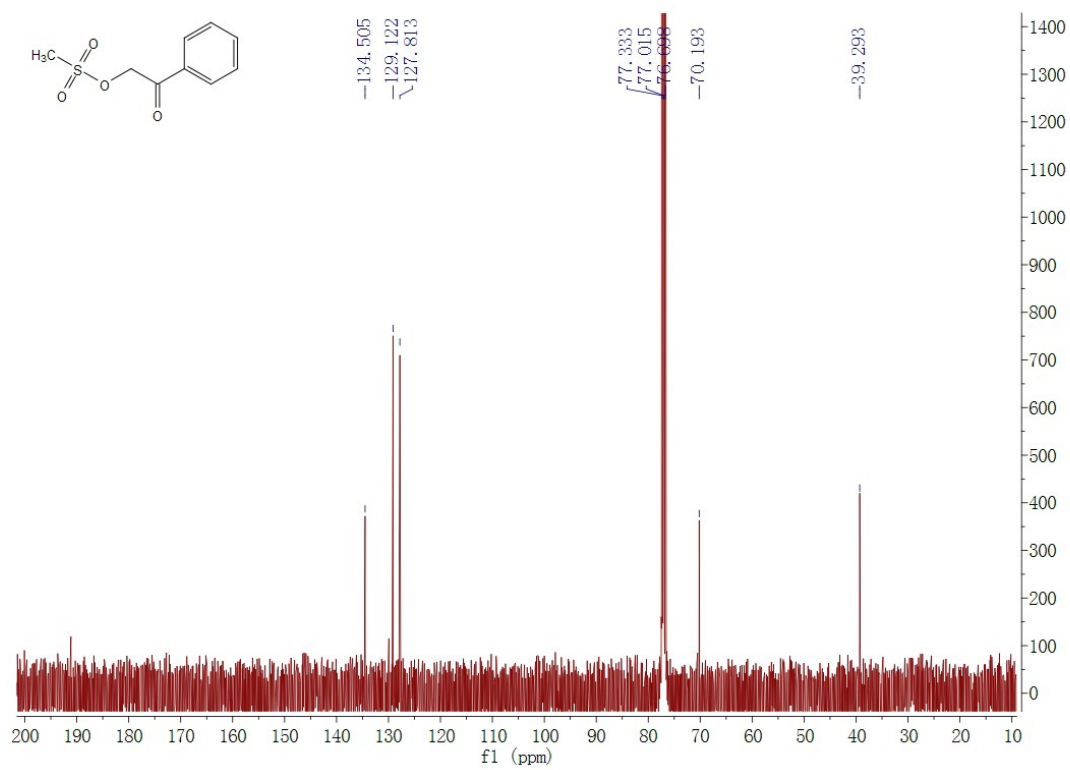

### 1-Oxo-1-phenylethyl Ethanesulfonate (Scheme 2, 3ac)

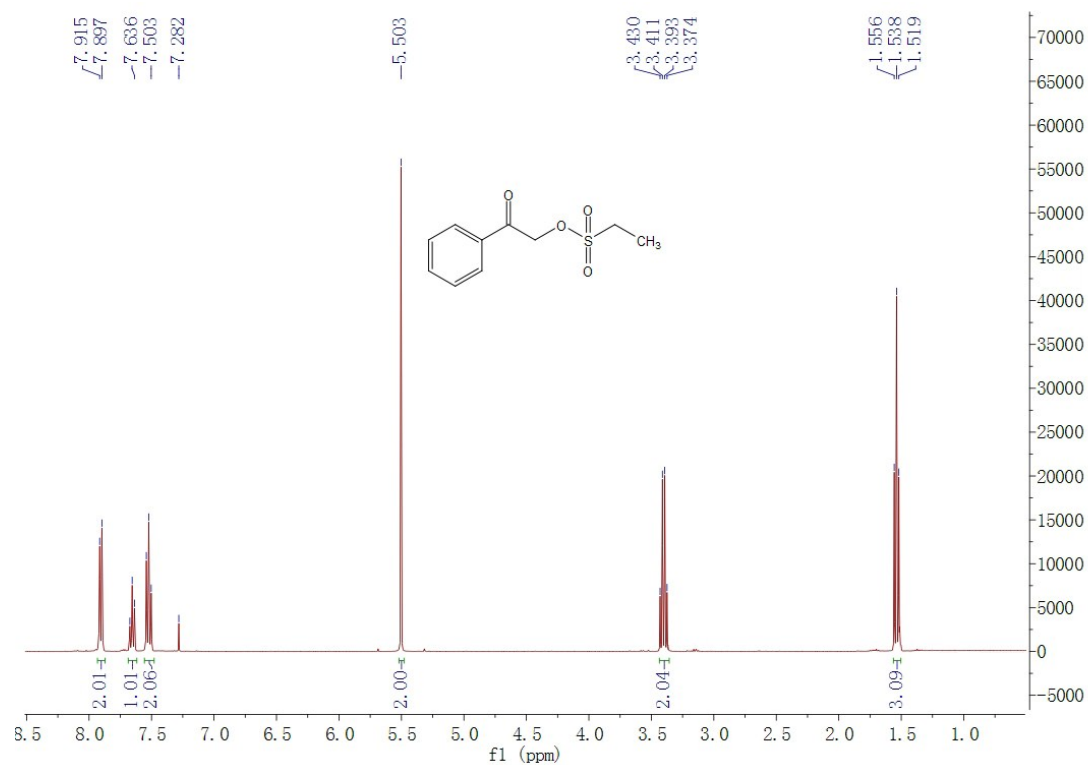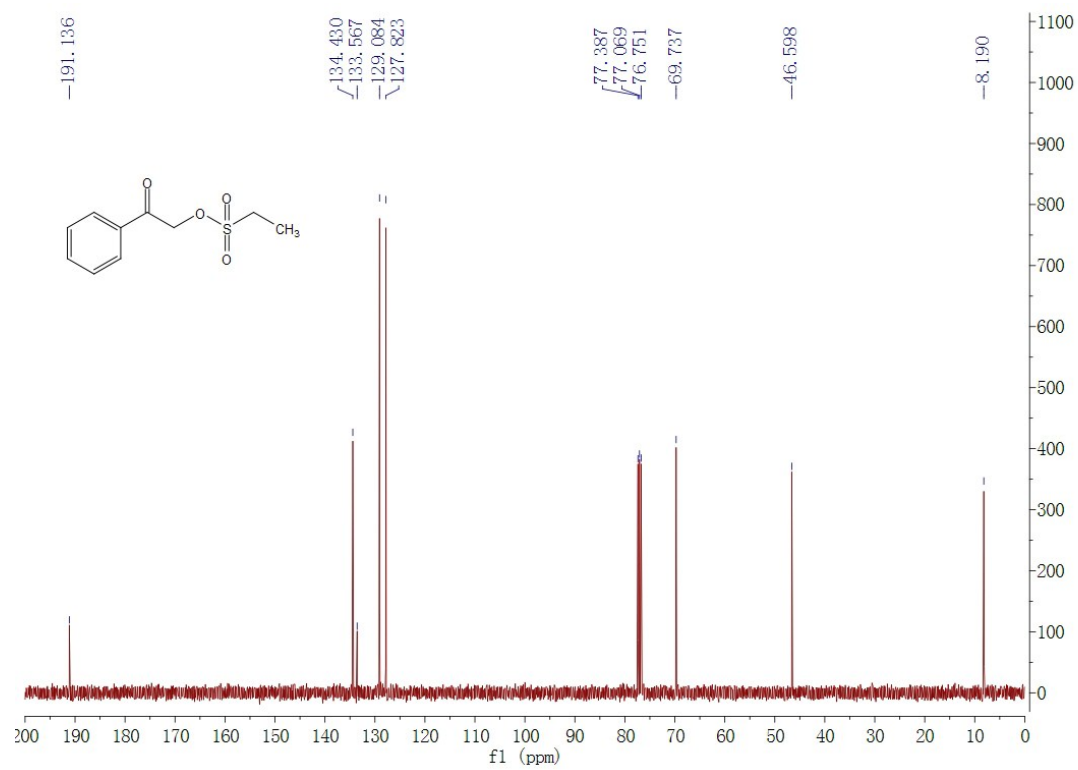

### 1-Oxo-1-phenylethyl Benzenesulfonate (Scheme 2, 3ad)

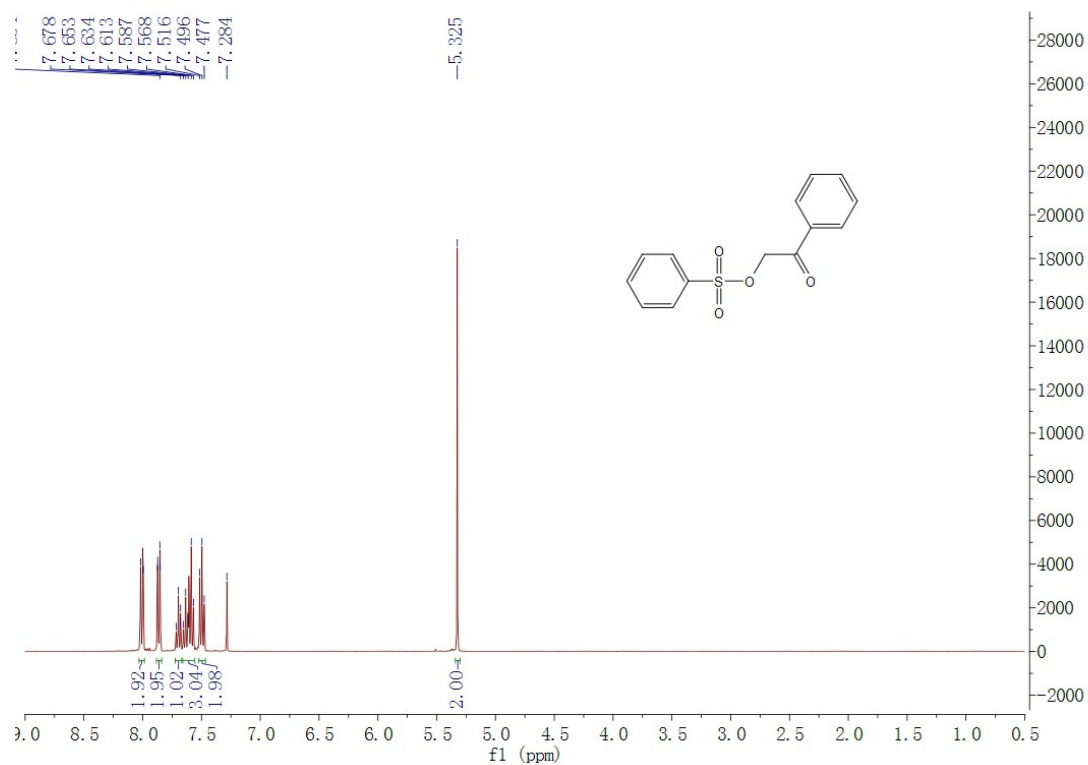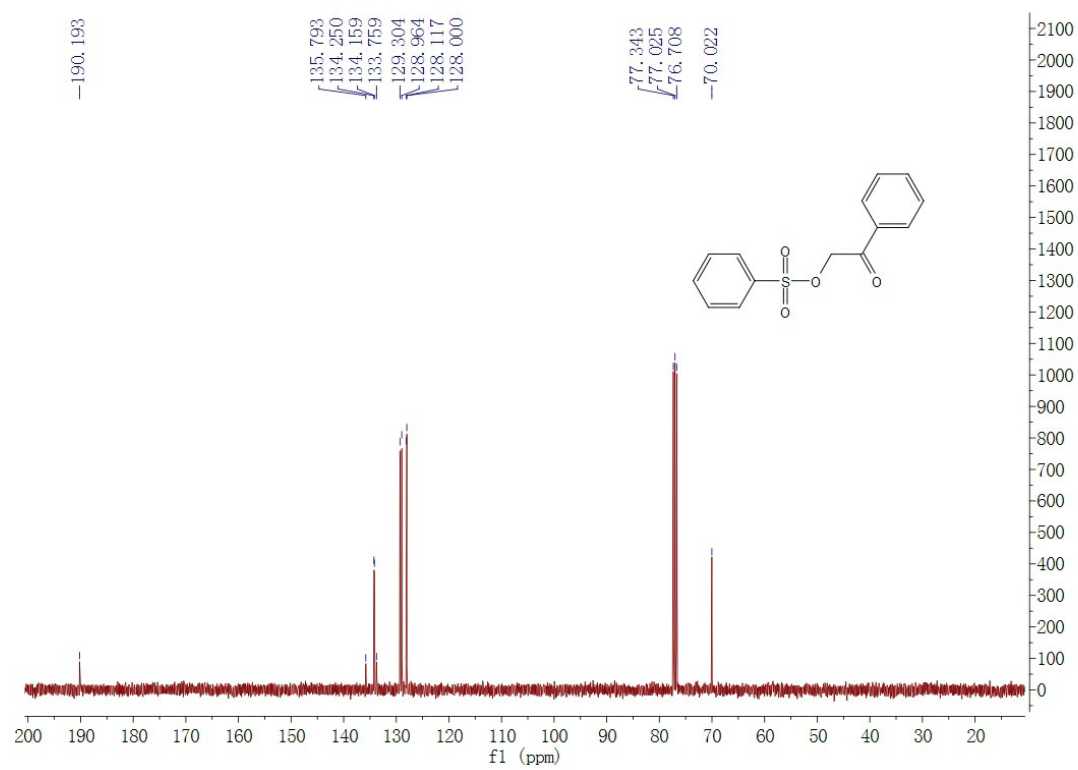

### 1-Oxo-1-phenylethyl 2-Naphthalenesulfonate (Scheme 2, 3ae)

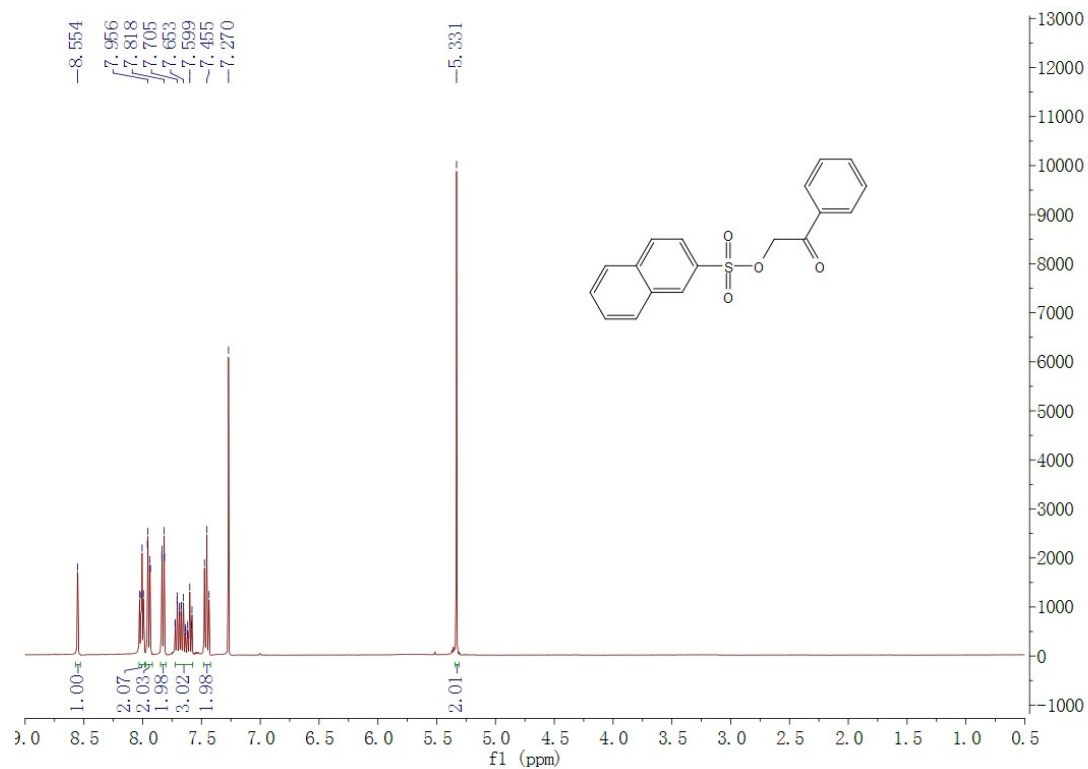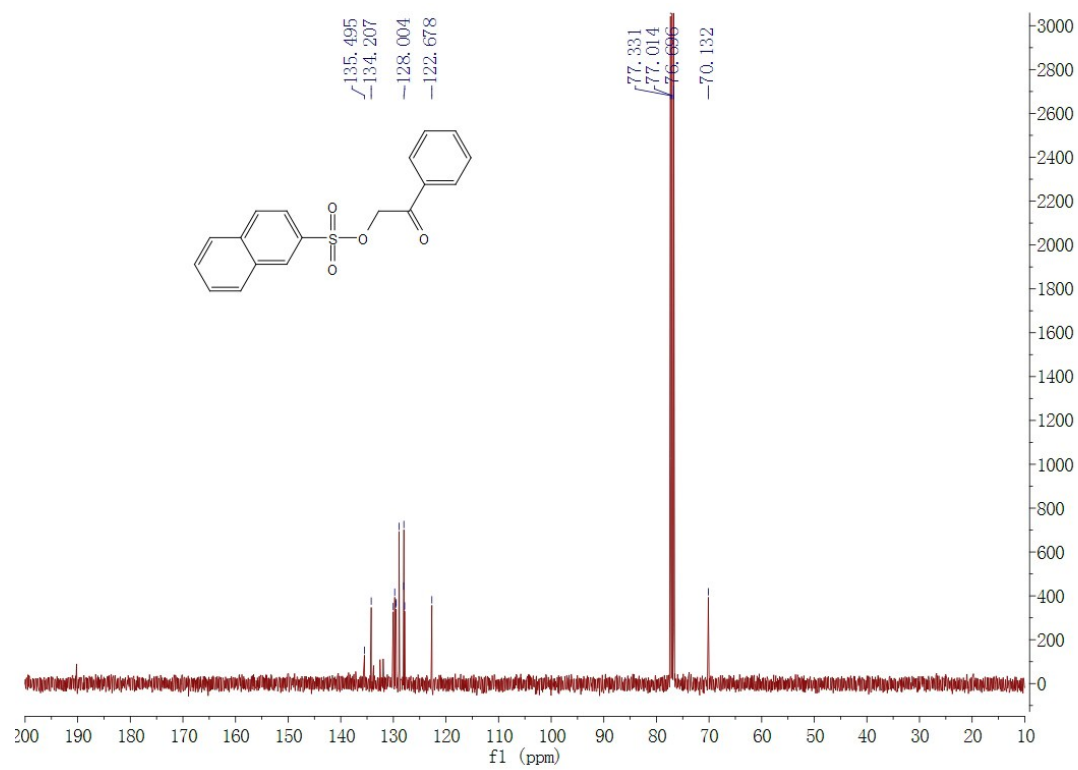

## References

- [1] Shah, A. A.; Khan, Z. A.; Choudhary, N.; Lohölter, C.; Schäfer, S.; Marie, G. P. L.; Farooq, U.; Witulski, B.; Wirth, T. *Org. Lett.* **2009**, *11*, 3578–3581.
- [2] Abe, A.; Sakuratani, K.; Togo, H. *J. Org. Chem.* **2001**, *66*, 6174–6177.
- [3] Thorat, P. B.; BBhong, B. Y.; Shelke, A. V.; Karade, N. N. *Tetrahedron Lett.* **2014**, *55*, 3332–3335.
- [4] Calter, M. A.; Korotkov, A. *Org. Lett.* **2011**, *13*, 6328–6330.
- [5] Karade, N. N.; Tiwari, G. B.; Shinde, S. V. *Tetrahedron Lett.* **2008**, *49*, 3441–3443.
- [6] Brenet, S.; Minozzi, C.; Clarens, B.; Amiri, L.; Berthiol, F. *Synthesis* **2015**, *47*, 3859–3873.
- [7] Yu, J.; Cui, J.; Hou, X. S.; Liu, S. S.; Gao, W. C.; Jiang, S.; Tian, J.; Zhang, C. *Tetrahedron-Asymmetr.* **2011**, *22*, 2039–2055.
- [8] Zhang, B. J.; Han, L. Q.; Hu, J. T.; Yan, J. *Synthetic. Commun.* **2014**, *44*, 3264–3270.
- [9] Berner, G.; Rutsch, W. **1985**, Eur. Pat. Appl. EP 132225 A2 19850123.
